# Supplementary material
Source: ML conference proceedings conference paper supplement (https://openaccess.thecvf.com/content/CVPR_2019/html/Puy_A_Flexible_Convolutional_CVPR_2019_paper.html)
Supplement: Supplementary file 1 [file Puy_A_Flexible_Convolutional_CVPR_2019_supplemental.pdf]

Archive with 2 entries (2 files):
- supplementary.pdf
- video.avi
