# Supplementary material
Source: ML conference proceedings conference paper supplement (https://openaccess.thecvf.com/content/CVPR_2019/html/Puy_A_Flexible_Convolutional_CVPR_2019_paper.html)
Supplement: Supplementary file 1 [file Puy_A_Flexible_Convolutional_CVPR_2019_supplemental.pdf › supplementary.pdf]

# A Flexible Convolutional Solver for Fast Style Transfers

## Supplementary material

Gilles Puy  
Technicolor  
975 Avenue des Champs Blancs  
F-35576 Cesson-Sévigné  
gilles.puy@technicolor.com

Patrick Pérez  
Valeo.ai  
15 Rue de la Baume  
F-75008 Paris  
patrick.perez@valeo.com

In this document, we start by recalling some basics about graph signal filtering in Sec. 1 and then discussing a limitation of our architecture in Sec. 2. We finally present additional results in the Sec. 3.

### 1. Filtering on Graphs

Let us recall that  $L$  denotes the matting Laplacian [5] and that the proximal operator that favours photorealism satisfies

$$P_{\mathcal{R}}(Y) = (I + 2\lambda_L L)^{-1} Y. \quad (1)$$

To explain how to estimate  $P_{\mathcal{R}}(Y)$  efficiently, let us recall some basics of graph signal processing [9].

Let  $\mathcal{G}$  be a graph of  $n$  nodes with Laplacian  $L \in \mathbb{R}^{n \times n}$ . A signal on  $\mathcal{G}$  can be represented by a vector  $x \in \mathbb{R}^n$  where the  $i^{\text{th}}$  entry of  $x$ , denoted  $x_i$ , is the value of the signal at the  $i^{\text{th}}$  node of the graph. The graph Fourier transform of  $x \in \mathbb{R}^n$  is defined as  $\hat{x} = U^T x$ , where  $U = (u_1, \dots, u_n) \in \mathbb{R}^{n \times n}$  is the matrix of eigenvectors of  $L$ :  $L = U \Sigma U^T$ , where  $\Sigma = \text{diag}(\sigma_1, \dots, \sigma_n) \in \mathbb{R}^{n \times n}$  and  $\sigma_1 \leq \dots \leq \sigma_n$ . With this tool in hand, one can define spectral graph filtering as follows:

$$x * u = U \text{diag}(u(\sigma_1), \dots, u(\sigma_n)) U^T x, \quad (2)$$

where  $x * u$  is the signal  $x$  filtered by  $u : \mathbb{R}_+ \rightarrow \mathbb{R}$ .

Let us now rewrite  $P_{\mathcal{R}}(Y)$  as the result of a graph filtering operation. We define

$$i_{\lambda_L}(\sigma) = \frac{1}{1 + 2\lambda_L \sigma}. \quad (3)$$

Using the fact that  $UU^T = I$ , we have

$$P_{\mathcal{R}}(Y) = (I + 2\lambda_L L)^{-1} Y \quad (4)$$

$$= [U (I + 2\lambda_L \Sigma) U^T]^{-1} Y \quad (5)$$

$$= U (I + 2\lambda_L \Sigma)^{-1} U^T Y \quad (6)$$

$$= U \text{diag}(i_{\lambda_L}(\sigma_1), \dots, i_{\lambda_L}(\sigma_n)) U^T Y \quad (7)$$

$$= Y * i_{\lambda_L}. \quad (8)$$

This proves that  $P_{\mathcal{R}}(Y)$  can be obtained by graph filtering each column of  $Y$  with  $i_{\lambda_L}$ . Nevertheless, one cannot use directly the formula (7) to compute the result as this requires the computation of  $U$ , which is intractable for real size images.

A solution to estimate  $P_{\mathcal{R}}(Y)$  rapidly is to use the graph filtering technique detailed in [3]. The core of this technique consists in approximating  $i_{\lambda_L}$  by Chebyshev polynomials of order  $P > 0$ . We use  $P = 80$  in practice. We let the reader refer to [3] for the computation details of this approximation. In order to explain why this technique is efficient, let us denote the polynomial approximation of  $i_{\lambda_L}$  by

$$\tilde{i}_{\lambda_L}(\sigma) = \sum_{k=0}^P \alpha_k \sigma^k \approx i_{\lambda_L}(\sigma), \quad (9)$$

where  $\alpha_0, \dots, \alpha_P \in \mathbb{R}$  are the polynomial coefficients. We thus obtain

$$P_{\mathcal{R}}(Y) \approx Y * \tilde{i}_{\lambda_L} \quad (10)$$

$$= U \text{diag}(\tilde{i}_{\lambda_L}(\sigma_1), \dots, \tilde{i}_{\lambda_L}(\sigma_n)) U^T Y \quad (11)$$

$$= \sum_{j=1}^n \tilde{i}_{\lambda_L}(\sigma_j) u_j u_j^T Y \quad (12)$$

$$= \sum_{j=1}^n \sum_{k=0}^P \alpha_k \sigma_j^k u_j u_j^T Y \quad (13)$$

$$= \sum_{k=0}^P \alpha_k \left( \sum_{j=1}^n \sigma_j^k u_j u_j^T \right) Y \quad (14)$$

$$= \sum_{k=0}^P \alpha_k (U \text{diag}(\sigma_1^k, \dots, \sigma_n^k) U^T) Y \quad (15)$$

$$= \sum_{k=0}^P \alpha_k L^k Y. \quad (16)$$

Note that (16) can be computed using only  $P$  matrix-vector multiplications with  $L$  ( $L^k$  does not need to be computed

nor stored). As  $L$  is sparse, these multiplications are fast to compute. Hence, graph filtering is also fast. Note that, in practice, the implementation of this filtering technique is not done via (16) but by using recurrence relation of Chebyshev polynomials [3].

## 2. Non-homogeneity of the backward maps

Let us discuss a limitation in the current version of our fast style transfer network.

First, we remark that the style transfer loss satisfies

$$\begin{aligned}\mathcal{L}(X) &= \mathcal{L}_c(X, X_c) + \sum_{\ell \in \mathcal{I}_s} \frac{\lambda_s^\ell}{c_\ell^2} \left\| \frac{1}{n_\ell} F_\ell^\top F_\ell - \frac{1}{n'_\ell} S_\ell^\top S_\ell \right\|_F^2 \\ &= \mathcal{L}_c(X, X_c) + \sum_{\ell \in \mathcal{I}_s} \frac{1}{c_\ell^2} \left\| \frac{\sqrt{\lambda_s^\ell}}{n_\ell} F_\ell^\top F_\ell - \frac{\sqrt{\lambda_s^\ell}}{n'_\ell} S_\ell^\top S_\ell \right\|_F^2.\end{aligned}$$

The first version of the loss  $\mathcal{L}$  is the one we used to construct our network. This version led to the following formula for the learned update

$$g(X, X_s) = \sum_{\ell \in \mathcal{I}_s} \lambda_s^\ell b_\ell \left( \frac{1}{n'_\ell} f_\ell(X) \cdot G_\ell^\top S_\ell^\top S_\ell H_\ell \right). \quad (17)$$

If one uses the second version of the loss  $\mathcal{L}$  and propagates the changes in our network, the learned update becomes

$$\tilde{g}(X, X_s) = \sum_{\ell \in \mathcal{I}_s} b_\ell \left( \frac{\sqrt{\lambda_s^\ell}}{n'_\ell} f_\ell(X) \cdot G_\ell^\top S_\ell^\top S_\ell H_\ell \right). \quad (18)$$

Nevertheless, we have  $g(X, X_s) \neq \tilde{g}(X, X_s)$ . Indeed, the backward maps  $b_\ell$  are not homogeneous in our network due to the presence of biases in the convolutional layers. Hence using  $g(X, X_s)$  or  $\tilde{g}(X, X_s)$  does not yield the same result whereas the corresponding version of the style transfer loss are equal.

A possibility to enforce homogeneity of the backward maps is to remove the biases in the corresponding convolutional layers. An alternative is to enforce approximate homogeneity, *e.g.*, by adding, during learning, a regularisation favouring the fact that  $g(X, X_s)$  and  $\tilde{g}(X, X_s)$  should be similar. Preliminary results seem to indicate that removing the biases in the convolutional layers leads to non-satisfactory results. Solving this limitation of the method should be the subject of further investigation. We recall however that – as shown in the main part of this article – this limitation does not prevent us to control the intensity of the style transfer, control the style scales involved in the results, introduce masks to stylise differently different parts of the image, introduce regularisations to perform photorealistic style transfer, or video style transfer, *etc.*

## 3. Additional results

### 3.1. Artistic style transfer results

We present in Fig. 1 additional results obtained with our network and with the methods of [2, 4, 6]. Our results are visually similar to those of state-of-the-art methods. Quantitatively, the method of [2] reaches the lowest value for  $\mathcal{L}_{TV}(X)$  and all the fast methods obtain similar values. Again, the second best value is, most of the times, obtained by our network. We recall that this is expected as our network is trained to minimise  $\mathcal{L}_{TV}$  while the others are not.

### 3.2. Photorealistic style transfer results

We present in Fig. 2 additional results obtained with our method and with the methods of [8, 7].

We remark that we obtain similar results to the fast method of [7], which, unlike ours, is specifically designed for photorealistic style transfer. Let us acknowledge that, for some examples, the results obtained with the our method and the method of [7] lack color saturation compared to those obtained with the original method of [8], which however requires a few minutes of computations for each stylisation.

### 3.3. Video style transfer results

We provide in the attached folder two more videos stylised with our method, which includes short-term consistency regulariser, and with the method of [6] for artistic style transfer or [7] for photorealistic style transfer, which both do not enforce temporal consistency.

As for the results in the main part of the paper, we remark flickering artefacts in the videos obtained with [6, 7]. Applying the temporal consistency proximal operator on the results of [6, 7] attenuates flickering but does not remove it. Our videos present less flickering than the post-processed results of [6, 7]. We acknowledge however that the difference is less noticeable in the fourth provided video.

Beyond temporal consistency, we remark that the stylisations obtained with the methods of [6, 7] are quite different than those obtained with our method (even when we remove the short-term consistency proximal operator in our method).

### 3.4. User-guided super-resolution

We present in Fig. 3 additional user-guided super-resolution results of textures.

As in the main part of the paper, our method performs better than SRCNN [1]. Concerning our method, similar PSNRs are reached with and without user inputs but the SNRs between the Gram matrices are improved with the user inputs. This indicates that we obtain better reconstructions of the overall textures, even though not pixel-accurate.

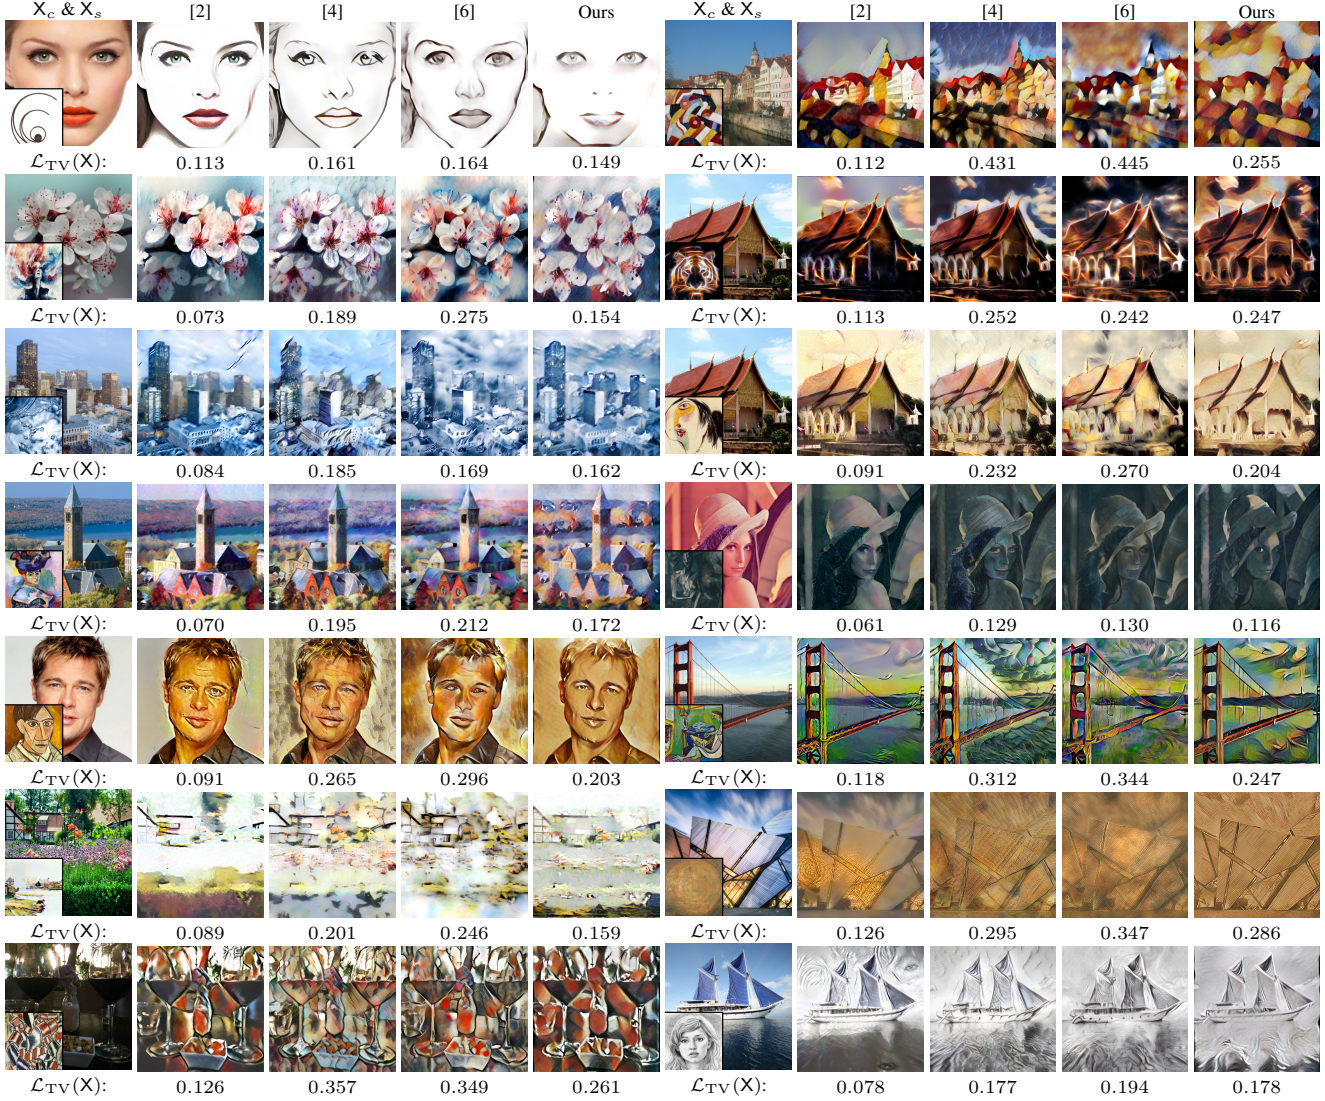

Figure 1. Artistic style transfer results on still images obtained with the method of [2, 4, 6] and ours. The achieved loss  $\mathcal{L}_{TV}(X)$  is reported below each image. The style images appear in the bottom left corner of the content images.

Visually, our method with user inputs permits to enhance the high-frequencies. This is mainly visible in the examples in the last row of Fig. 3.

## References

- [1] Chao Dong, Chen Change Loy, He Kaiming, and Xiaoou Tang. Learning a deep convolutional network for image super-resolution. In *European Conference on Computer Vision (ECCV)*, pages 184–199, 2014.
- [2] Leon A. Gatys, Alexander S. Ecker, and Matthias Bethge. Image style transfer using convolutional neural networks. In *IEEE Conference on Computer Vision and Pattern Recognition (CVPR)*, pages 2414–2423, 2016.
- [3] David K. Hammond, Pierre Vandergheynst, and Rémi Gribonval. Wavelets on graphs via spectral graph theory. *Appl. Comput. Harmon. Anal.*, 30(2):129–150, 2011.
- [4] Xun Huang and Serge Belongie. Arbitrary style transfer in real-time with adaptive instance normalization. In *IEEE International Conference on Computer Vision (ICCV)*, pages 1510–1519, 2017.
- [5] Anat Levin, Dani Lischinski, and Yair Weiss. A closed-form solution to natural image matting. *IEEE Trans. Pattern Anal. Mach. Intell.*, 30(2):228–242, 2008.
- [6] Yijun Li, Chen Fang, Jimei Yang, Zhaowen Wang, Xin Lu, and Ming-Hsuan Yang. Universal style transfer via feature transforms. In *Advances in Neural Information Processing Systems (NIPS)*, pages 386–396, 2017.
- [7] Yijun Li, Ming-Yu Liu, Xueting Li, Ming-Hsuan Yang, and Jan Kautz. A closed-form solution to photorealistic image stylization. *European Conference on Computer Vision (ECCV)*, pages 468–483, 2018.

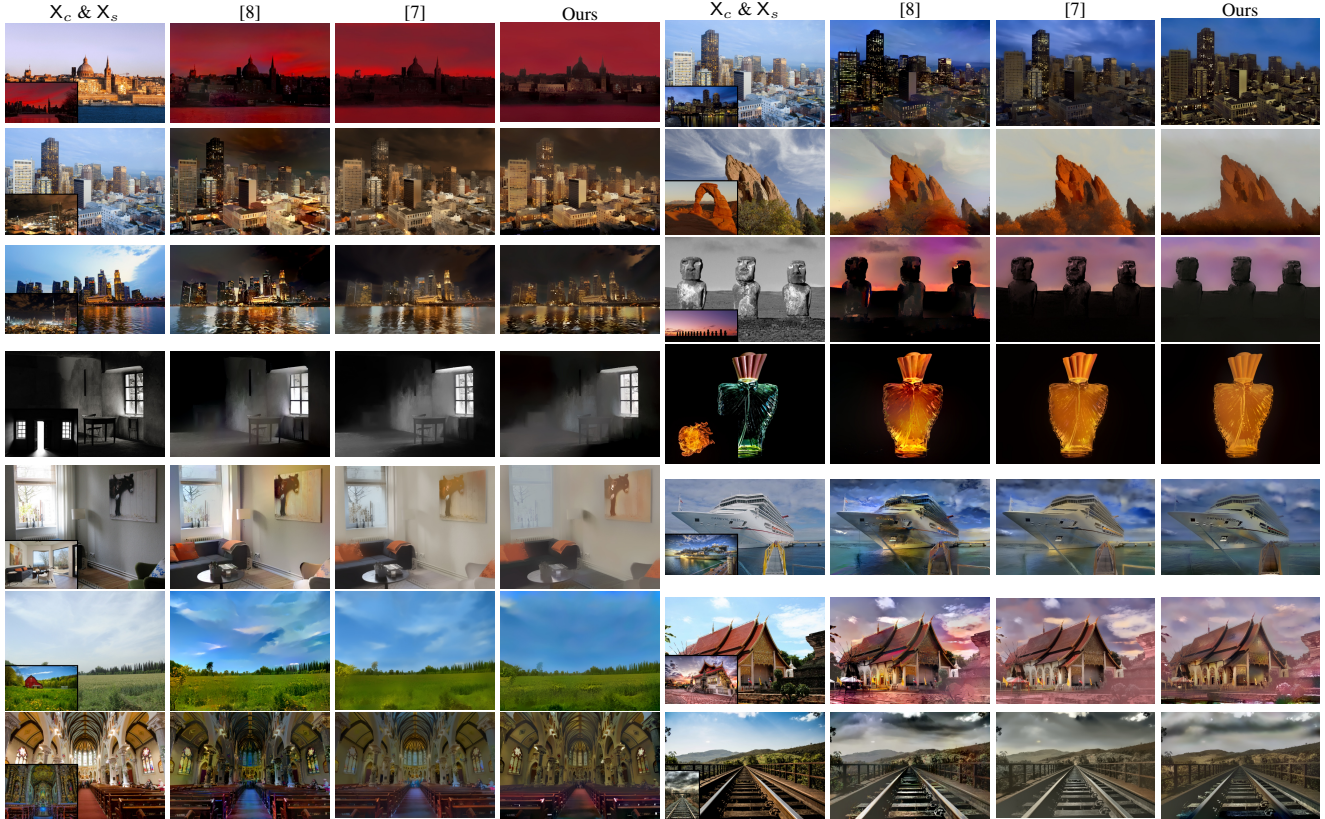

Figure 2. Photorealistic style transfer results on still images obtained with the method of [8, 7] and ours. The style images appear in the bottom left corner of the content images.

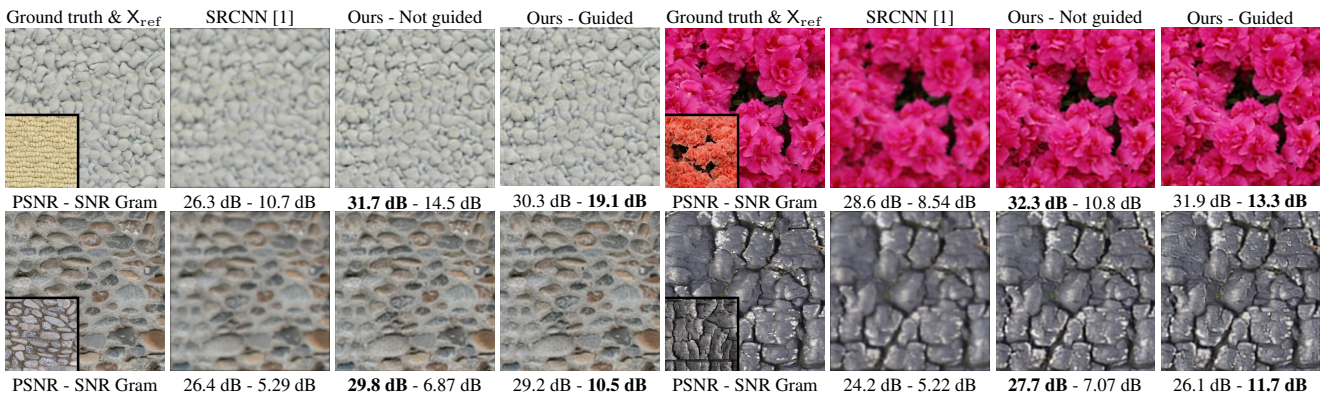

Figure 3. Informed texture super-resolution ( $\times 3$  in both directions) using a user provided texture  $X_{ref}$  (bottom left in ground truth image). The PSNR between the reconstructed and ground truth images, and the SNR between the VGG-19 Gram matrices of the same images is provided below each result. Results are better viewed when zooming in.

[8] Fujun Luan, Sylvain Paris, Eli Shechtman, and Kavita Bala. Deep photo style transfer. In *IEEE Conference on Computer Vision and Pattern Recognition (CVPR)*, pages 6997–7005, 2017.

[9] David I. Shuman, Sunil K. Narang, Pascal Frossard, Antonio

Ortega, and Pierre Vandergheynst. The emerging field of signal processing on graphs: Extending high-dimensional data analysis to networks and other irregular domains. *IEEE Signal Processing Magazine*, 30(3):83–98, 2013.
